# Supplementary material for: Global analysis of gene expression profiles in physic nut (Jatropha curcas L.) seedlings exposed to drought stress
Source: PubMed Central journal article supplement (PMC4307156; doi:10.1186/s12870-014-0397-x), 2015-01-21
Supplement: 12870_2014_397_MOESM1_ESM.pdf [file 12870_2014_397_MOESM1_ESM.pdf]

Table S1. Sequencing saturation analysis

| Tissue                     | Control | Drought stress |
|----------------------------|---------|----------------|
| Root - 1 d - replication 1 |         |                |
| Root - 1 d - replication 2 |         |                |
| Root - 4 d - replication 1 |         |                |

Root - 4 d -  
replication 2

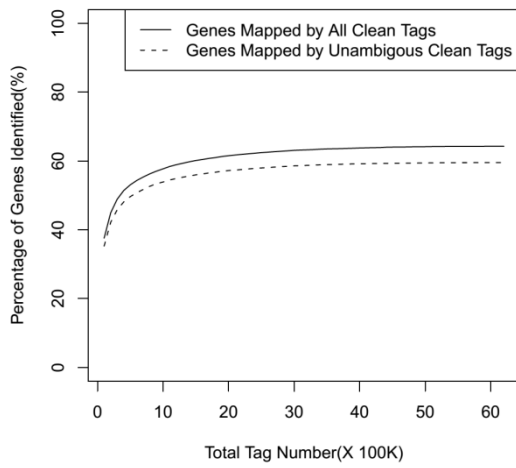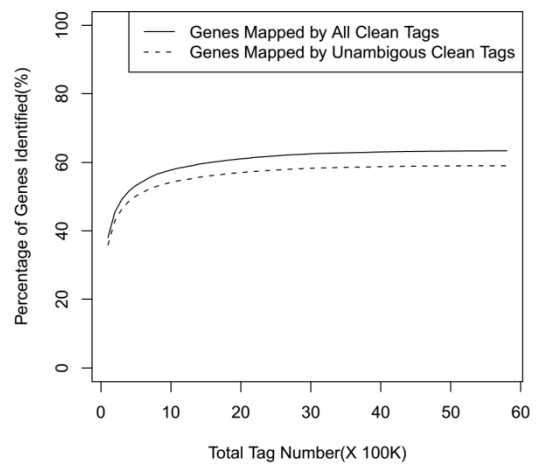

Root - 7 d -  
replication 1

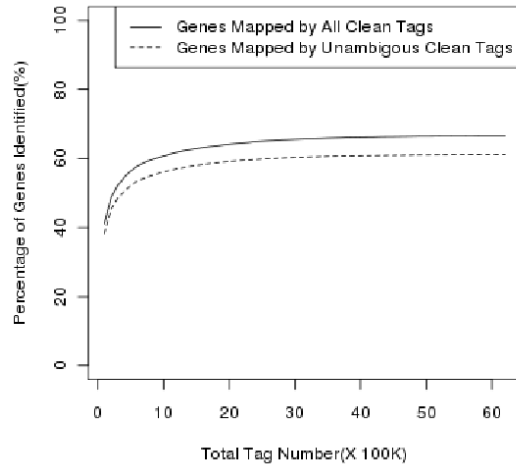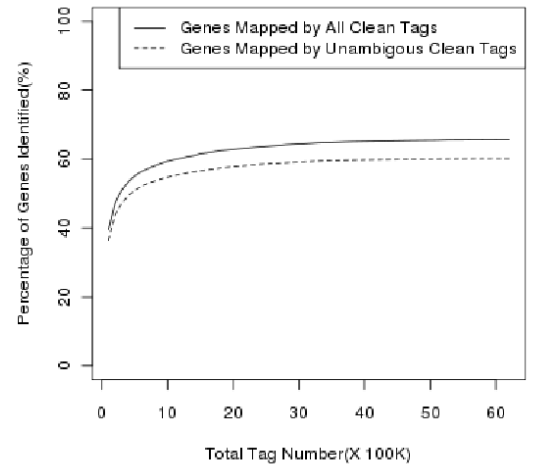

Root - 7 d -  
replication 2

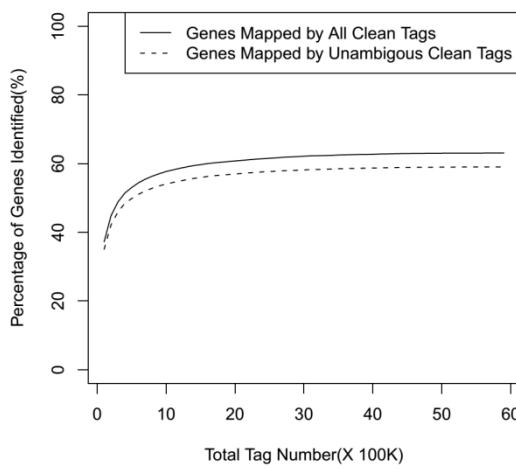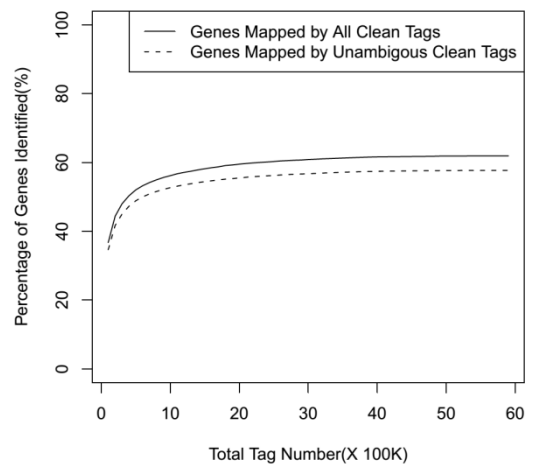

|                                       |  |  |
|---------------------------------------|--|--|
| <p>Leaf - 1 d -<br/>replication 1</p> |  |  |
| <p>Leaf - 1 d -<br/>replication 2</p> |  |  |
| <p>Leaf - 4 d -<br/>replication 1</p> |  |  |
| <p>Leaf - 4 d -<br/>replication 2</p> |  |  |

|                                       |                                                                                                                                                                   |                                                                                                                                                                   |
|---------------------------------------|-------------------------------------------------------------------------------------------------------------------------------------------------------------------|-------------------------------------------------------------------------------------------------------------------------------------------------------------------|
|                                       | <p>Percentage of Genes Identified(%)</p> <p>Total Tag Number(X 100K)</p> <p>— Genes Mapped by All Clean Tags<br/>- - - Genes Mapped by Unambiguous Clean Tags</p> | <p>Percentage of Genes Identified(%)</p> <p>Total Tag Number(X 100K)</p> <p>— Genes Mapped by All Clean Tags<br/>- - - Genes Mapped by Unambiguous Clean Tags</p> |
| <p>Leaf - 7 d -<br/>replication 1</p> | <p>Percentage of Genes Identified(%)</p> <p>Total Tag Number(X 100K)</p> <p>— Genes Mapped by All Clean Tags<br/>- - - Genes Mapped by Unambiguous Clean Tags</p> | <p>Percentage of Genes Identified(%)</p> <p>Total Tag Number(X 100K)</p> <p>— Genes Mapped by All Clean Tags<br/>- - - Genes Mapped by Unambiguous Clean Tags</p> |
| <p>Leaf - 7 d -<br/>replication 2</p> | <p>Percentage of Genes Identified(%)</p> <p>Total Tag Number(X 100K)</p> <p>— Genes Mapped by All Clean Tags<br/>- - - Genes Mapped by Unambiguous Clean Tags</p> | <p>Percentage of Genes Identified(%)</p> <p>Total Tag Number(X 100K)</p> <p>— Genes Mapped by All Clean Tags<br/>- - - Genes Mapped by Unambiguous Clean Tags</p> |
